# Supplementary material
Source: PubMed Central journal article supplement (PMC6246836)
Supplement: 12264_2018_288_MOESM1_ESM.pdf [file 12264_2018_288_MOESM1_ESM.pdf]

**Cortical Inflammation is Increased in a DSS-Induced Colitis Mouse Model**

Ying Han<sup>1,2</sup>, Tong Zhao<sup>2</sup>, Xiang Cheng<sup>2</sup>, Ming Zhao<sup>2</sup>, Sheng-hui Gong<sup>2</sup>, Yong-qi Zhao<sup>2</sup>, Hai-tao Wu<sup>2</sup>, Ming Fan<sup>1,2,3#</sup>, Ling-Ling Zhu<sup>2,3#</sup>

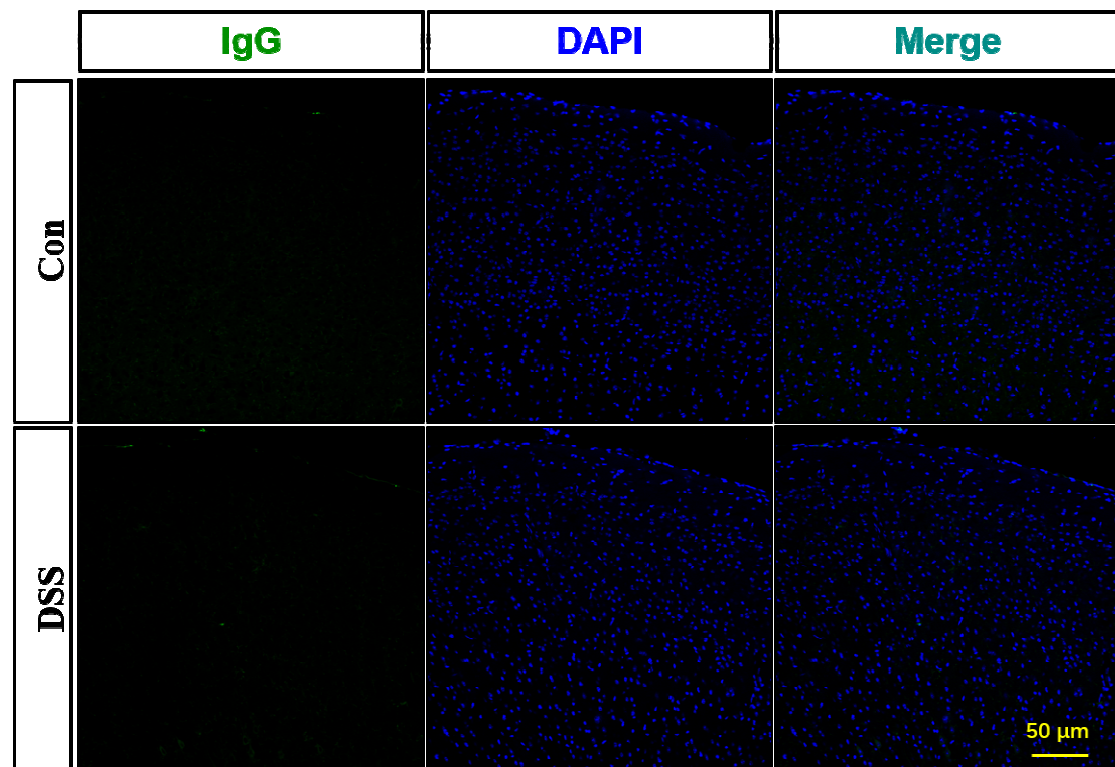

Fig. S1 Representative images of Immunofluorescence staining for endogenous IgG proteins in cortex on day 7 after DSS treatment. There was no significant difference in the content of IgG in the cerebral cortex.

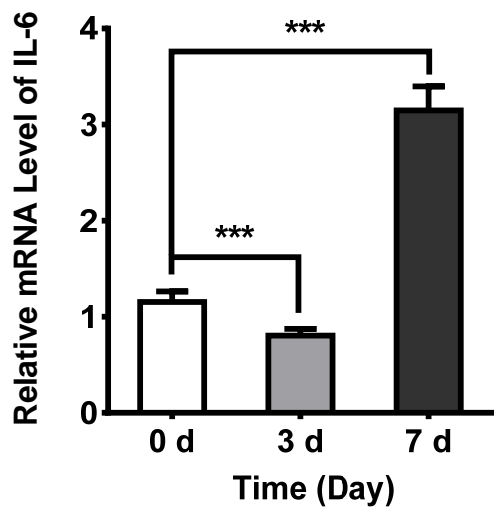

Fig. S2 Effects of DSS-induced colitis on the mRNA levels of IL-6 in cortex on day 3 and day 7. The IL-6 level was significantly increased in the DSS-induced group on day 7 (\*\* $P < 0.001$ ;  $n = 4$ /group), as revealed by Q-PCR.

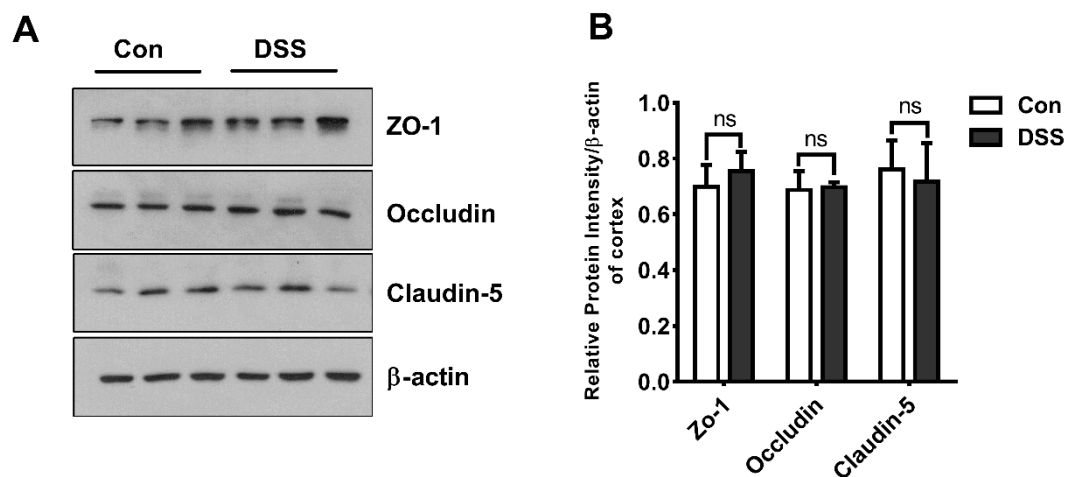

Fig. S3 Effects of DSS-induced colitis on the levels of ZO-1, Occludin and claudin-5. Western blots (A) and analysis (B) showed that 5% DSS treatment for 3 days did not change the levels of ZO-1, Occludin and claudin-5 in mouse cortex ( $n = 3$ /group).
